# Supplementary material
Source: Springer Nature journal article supplement (https://www.springermedizin.de/resource/supplementary/12958_2008_417_MOESM3_ESM.pdf/9567834)

**A.**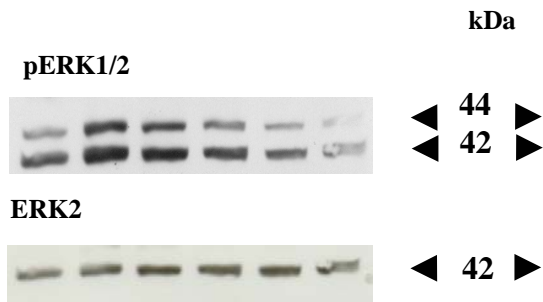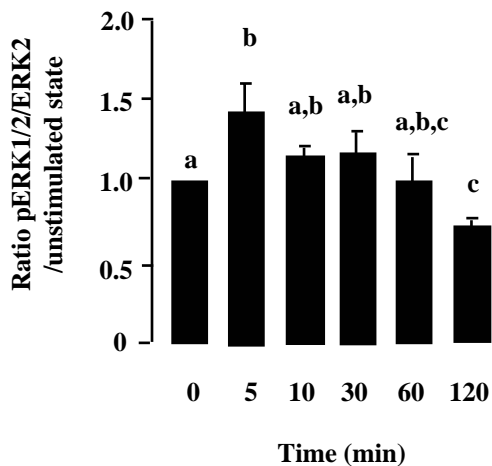**B.**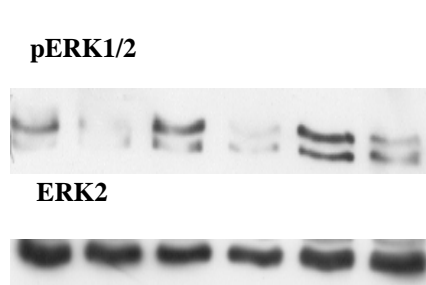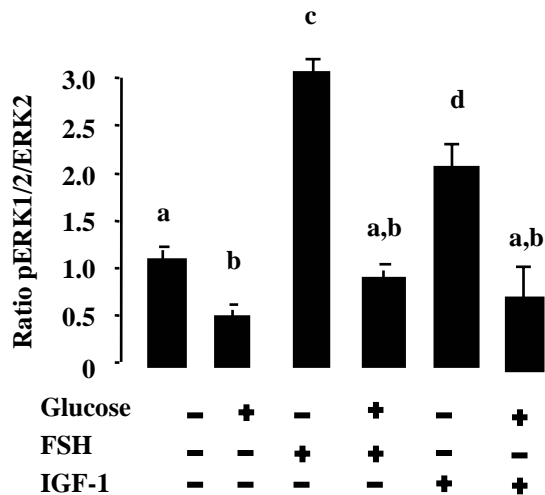

Supplement: MOESM3 [file 9567834]
